1 ***easyfm***: An **easy** software suite for **file manipulation** of Next Generation  
2 Sequencing data on desktops

3

4

5

6 **Hyungtaek Jung<sup>1a\*</sup>, Brendan Jeon<sup>2a\*</sup>, Daniel Ortiz-Barrientos<sup>1</sup>**

7 <sup>1</sup> School of Biological Sciences, The University of Queensland, St Lucia, Australia

8 <sup>2</sup> Department of Communication and Arts, The University of Queensland, St Lucia, Australia

9

10

11

12 <sup>a</sup> Equal contributions

13 \* [hyungtaek.jung@uq.edu.au](mailto:hyungtaek.jung@uq.edu.au) (HJ) and [b.jeon@uq.edu.au](mailto:b.jeon@uq.edu.au) (BJ)

## 1 **Abstract**

2 Storing and manipulating Next Generation Sequencing (NGS) file formats is an essential but  
3 difficult task in biological data analysis. The *easyfm* (**easy file manipulation**) toolkit  
4 (<https://github.com/TaekAndBrendan/easyfm>) makes manipulating commonly used NGS files  
5 more accessible to biologists. It enables them to perform end-to-end reproducible data analyses  
6 using a free standalone desktop application (available on Windows, Mac and Linux). Unlike  
7 existing tools (e.g. Galaxy), the Graphical User Interface (GUI)-based *easyfm* is not dependent  
8 on any high-performance computing (HPC) system and can be operated without an internet  
9 connection. This specific benefit allow *easyfm* to seamlessly integrate visual and interactive  
10 representations of NGS files, supporting a wider scope of bioinformatics applications in the  
11 life sciences.

12

13

## 14 **Author summary**

15 The analysis and manipulation of NGS data for understanding biological phenomena is an  
16 increasingly important aspect in the life sciences. Yet, most methods for analysing, storing and  
17 manipulating NGS data require complex command-line tools in HPC or web-based servers and  
18 have not yet been implemented in comprehensive, easy-to-use software. This is a major hurdle  
19 preventing more general application in the field of NGS data analysis and file manipulation.  
20 Here we present *easyfm*, a free standalone Graphical User Interface (GUI) software with  
21 Python support that can be used to facilitate the rapid discovery of target sequences (or user's  
22 interest) in NGS datasets for novice users. For user-friendliness and convenience, *easyfm* was  
23 developed with four work modules and a secondary GUI window (herein secondary window),  
24 covering different aspects of NGS data analysis (mainly focusing on FASTA files), including  
25 post-processing, filtering, format conversion, generating results, real-time log, and help. In  
26 combination with the executable tools (BLAST+ and BLAT) and Python, *easyfm* allows the  
27 user to set analysis parameters, select/extract regions of interest, examine the input and output  
28 results, and convert to a wide range of file formats. To help augment the functionality of  
29 existing web-based and command-line tools, *easyfm*, a self-contained program, comes with  
30 extensive documentation (hosted at <https://github.com/TaekAndBrendan/easyfm>) including a  
31 comprehensive step-by-step guide.

32

## 1 **1 Introduction**

2 With the broad implementation of NGS technologies in the life sciences, genomics and  
3 transcriptomics sequencing data are generated at an unprecedented rate [1–3]. Rapid progress  
4 in NGS technologies has brought massively high-throughput sequencing data to support  
5 research questions across many research fields, enabling a new era of genomic research [2,3].  
6 Simultaneously, this advancement has brought enormous challenges in data analysis, of which  
7 efficient, standardized and consistent analysis are fundamental steps for maintaining  
8 reproducibility, especially for biologists [1,3]. However, many of the available tools for NGS  
9 data analysis require higher-order computational experience (e.g. various  
10 programming/scripting languages), expensive infrastructure (adequate HPC facilities and  
11 Cloud computing) and lack GUIs, making them inaccessible to many researchers, and  
12 cumbersome for even experienced biologists. Thus, the development of user-friendly  
13 standalone software for NGS data will accelerate the pace of research for scientists who have  
14 limited computer and bioinformatics experience.

15 NGS data processing often involves consecutive steps of trimming (including quality  
16 check), assembling, mapping, manipulating, converting and processing large files. FASTA [4]  
17 and FASTQ [5] file formats are generated by most NGS platforms, and further SAM/BAM [6],  
18 BED [7], GFF/GTF [8], and VCF [9] can be derived using FASTA and FASTQ files depending  
19 on the required analysis. The FASTA file, based on simple text, is the most basic format for  
20 reporting a sequence and is accepted by almost all sequence analysis programs. Each sequence  
21 starts with a “>” followed by the sequence name, a description of the sequence, and the  
22 sequence itself (nucleic acids or amino acids). The FASTQ file, a text-based format for storing  
23 both a biological sequence (usually nucleotide sequence) and its corresponding quality scores,  
24 is the most widely used format in sequence analysis and NGS sequencers. Each sequence  
25 requires at least 4 lines starting with “@” followed by the sequence, a “+” sequence identifier,  
26 and quality scores. Conveniently, FASTQ files can also be converted to FASTA files, the most  
27 commonly used file format for NGS data that enables direct sequencing of target genes. Many  
28 available tools (easySEARCH [10]; BlasterJS [11]; Sequenceserver [12]; orfipy [13]);  
29 Samtools and BCFtools [14] including *easyfm*) have not surprisingly focused on manipulating  
30 (analyse, collect, organise, interpret, and present data in meaningful ways) the FASTA file  
31 format to generate biologically relevant insights.

32 For the last decade, many HPC and Cloud-based NGS command-line programs or web-  
33 based platforms have wrapped popular high-level analysis and visualisation tools in an intuitive

1 and appealing interface [15]. Galaxy (homepage: <https://galaxyproject.org>, main public server:  
2 <https://usegalaxy.org>, Australia: <https://usegalaxy.org.au/>) in particular has been successful in  
3 establishing itself as an analytics hub and an e-learning platform with global scientists,  
4 intending to produce accessible, reproducible and collaborative biological analyses [16,17].  
5 Even with the huge achievements made in many analytical software packages and pipelines,  
6 further improvements in user-friendly standalone software are still required to facilitate the  
7 rapid discovery of meaningful sequences in very large data sets for novice users. To help  
8 augment the functionality of existing tools and allow for user-friendliness and convenience of  
9 NGS file manipulation, *easyfm* enables end-to-end file filtering, extracting and converting  
10 (FASTQ to FASTA) with a simple mouse click on desktops.

11 The *easyfm*, implemented in Python 3.7+, was developed with four work modules  
12 (Basic Local Alignment Search Tool [BLAST], BLAST-Like Alignment Tool [BLAT], Open  
13 Reading Frames [ORF], and File Manipulation) and a secondary window (Project Folder, Help  
14 and Log). Together, these modules and secondary window cover different aspects of NGS data  
15 analysis (mainly focusing on FASTA files), including post-processing, filtering, format  
16 conversion, and generating results. The functionality of each module has been described in the  
17 Results and Discussion section to have an easy-to-follow parallel comparison. *easyfm* is a GUI-  
18 based, lightweight but powerful, free and open-source desktop software for  
19 querying/manipulating NGS data sources and generating various outcomes. Since everyone  
20 can use it from anywhere to analyse data and find target sequences easily without any coding,  
21 HPC and/or internet/web-server connection, we hope the usefulness of *easyfm* can extend its  
22 potential use in a wide range of bioinformatics applications in the life sciences including  
23 teaching/learning materials in the classroom.

24

## 1 **2 Design and implementation**

2 *easyfm* can be used both by sophisticated data scientists and non-technical users who need an  
3 intuitive interface. The original intent for producing *easyfm* was to reduce reliance on any  
4 command lines/scripts or web-based platforms, by creating a standalone lightweight program  
5 with substantially reduced computational demands. *easyfm* provides key benefits in  
6 convenience, accessibility, and reproducibility because it does not include any heavyweight  
7 NGS data assembly, mapping and clustering workflows. *easyfm* can execute any pre-assembled  
8 genome/transcriptome FASTA files by selecting CPU numbers on a user's desktop. While it  
9 mainly focuses on point-and-click analysis for less technical users, Log and Help functions  
10 could provide an interactive experience for monitoring and iterating on an executed code.

11 The *easyfm* work modules can provide support for post-processing, filtering, format  
12 conversion, and generating results to your given data (e.g. FASTA/Q files). It integrates four  
13 Python libraries and two executable programs with additional visualisation and conversation  
14 tools (mostly many well-established open-source Python packages) (Table 1). BLAST and  
15 indexing features provide the foundation for *easyfm* with approaches for all four work modules  
16 (BLAST, BLAT, ORF, and File Manipulation). While the user is required to select a module  
17 to execute, the user has full control over which input (including compressed files: \*.gz) and  
18 output files/folders can be selected. *easyfm* also generates several output files (mostly in a tab-  
19 separated text file) that can be opened with standard text editors or Excel. To support work  
20 modules, *easyfm* also has a secondary window—Project Folder, Help and Log—that integrates  
21 with work modules (Fig 1). In addition, further assistance and information can be obtained via  
22 Help and Log to improve processes and performance. *easyfm* also contains all necessary  
23 dependencies. Simply unzip the folder and double-click *easyfm.exe* after downloading the  
24 program. Documentation, along with tutorials, is available at  
25 <https://github.com/TaekAndBrendan/easyfm>, and links to the *easyfm* download  
26 (<https://github.com/TaekAndBrendan/easyfm/raw/main/windows/easyfm.7z>).

27

28

1 **Table 1. Software packages integrated into *easyfm* and their applications.**

| Software                                                                                       | Application                                                                                                                           |
|------------------------------------------------------------------------------------------------|---------------------------------------------------------------------------------------------------------------------------------------|
| Python Packages                                                                                |                                                                                                                                       |
| Biopython [18]                                                                                 | Biopython is a set of freely available tools for common bioinformatics tasks including biological computation.                        |
| PyQt5 ( <a href="https://pypi.org/project/PyQt5/">https://pypi.org/project/PyQt5/</a> )        | PyQt is a Python binding of the cross-platform GUI toolkit Qt.                                                                        |
| gffutils ( <a href="https://github.com/daler/gffutils">https://github.com/daler/gffutils</a> ) | gffutils is for working with and manipulating the GFF and GTF format files typically used for genomic annotations.                    |
| Pyfastx [19]                                                                                   | The pyfastx is a lightweight Python C extension that enables users to randomly access sequences from plain and gzipped FASTA/Q files. |
| Executable Programs                                                                            |                                                                                                                                       |
| BLAST+ (v2.11.0) [20]                                                                          | BLAST+ is a sequence similarity searching tool with an enhancement of speed and query length.                                         |
| BLAT (v3.2.1) [21]                                                                             | BLAT is an alignment tool like BLAST and is useful for aligning long sequences and gapped mapping.                                    |

2

3 Please note that *easyfm*, a self-contained program, includes all necessary dependencies and  
4 executable packages. Simply unzip the folder and double-click *easyfm.exe* after downloading  
5 the program.

6

7

8

## 1 **3 Results and Discussion**

### 2 **3.1 Practical integration of secondary window in *easyfm***

3 To maximise the capability of the work modules (BLAST, BLAT, ORF, and File  
4 Manipulation), *easyfm* provides a secondary window, containing the tabs Project Folder, Help  
5 and Log to enhance the intuitive interface and interactive experience. As illustrated in Fig 1,  
6 the secondary window GUI components are freely adjustable with mouse movement (four  
7 corners) and are seamlessly integrated with the main work module of *easyfm*. The user can  
8 control input and output files by selecting the work folder (Project Folder and Set Project in  
9 Fig 1B green box) to use work modules. While the user can start with the default folder or  
10 select a specific work folder via Project Folder in the local drive, the input files must be in the  
11 designated folder. If the files (including compressed files: \*.gz) are available in Project Folder,  
12 a simple right mouse click on the file can offer more options, such as Get Fasta Information  
13 (Stats), Open with Text Editor, Delete, and Create Folder (Fig 1B and 1C). The Help option is  
14 a resource intended to provide the end-user with information and support to *easyfm* work  
15 modules including its manual. To access additional information the user can click any of the  
16 links in Help (Fig 1D). Furthermore, to combine advanced functionalities with an easy-to-use  
17 interface, the Log option provides real-time log reporting and monitoring for every executed  
18 job (Fig 1D). This can aid in effective communication when reporting and resolving any  
19 program issues.

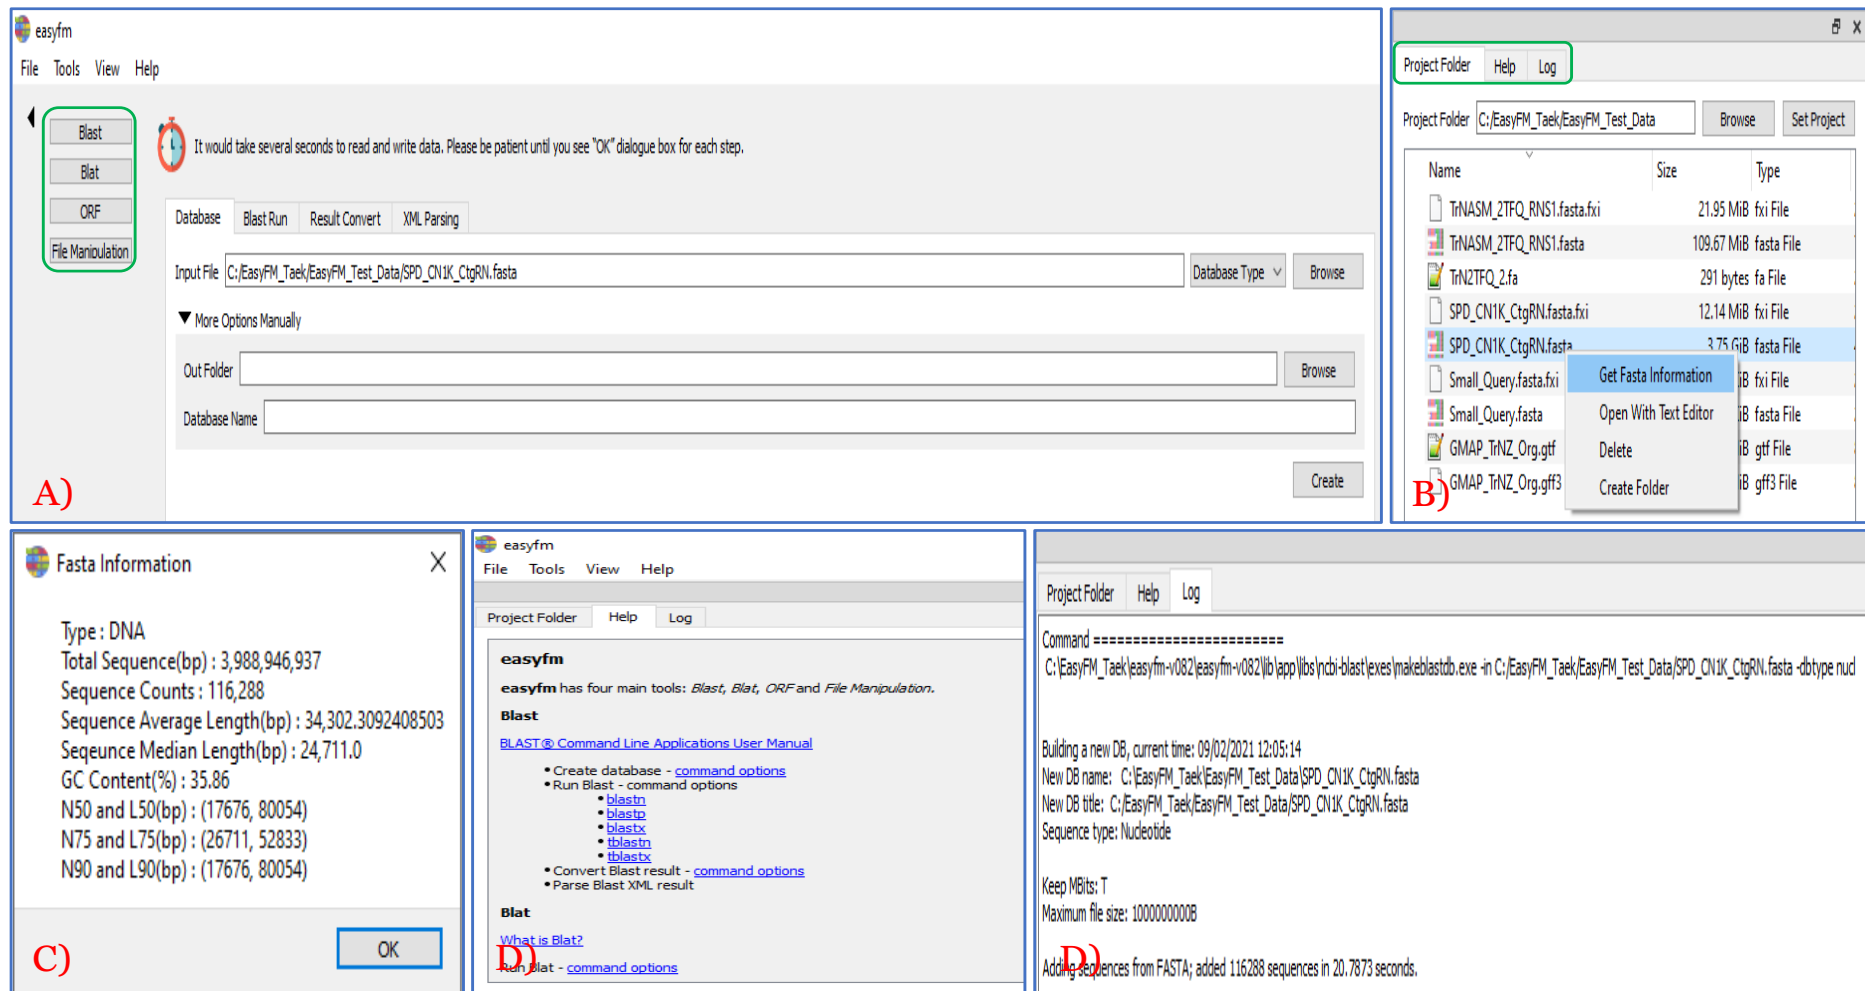

**Fig 1. Integration of secondary window with main work module of *easyfm*.** A) Four main work modules (green box) to BLAST, BLAT, ORF, and File Manipulation. B) Three secondary modules (green box) to assist with main work modules and extra features using a right mouse click. C) Fasta file stats information accessed from B. D) Adjustable secondary window (Help and Log) on the top and bottom.



1

## 2 **3.2 Intuitive interface of work modules in *easyfm***

3 To provide an integrated solution for NGS data file manipulation, *easyfm* provides an open-  
4 source tool with an easy installation and setup without relying on any web-based server or  
5 commercial licences. *easyfm* also allows users to consolidate the import/export data in  
6 FASTA/Q format (e.g. \*.gz) under four work modules (BLAST, BLAT, ORF, File  
7 Manipulation) with an easy step-by-step process. *easyfm* is distributed under the MIT licence  
8 as all-in-one installer packages that contain all necessary software tools plus a manual  
9 explaining the analysis workflows step-by-step (<https://github.com/TaekAndBrendan/easyfm>).

10

### 11 **3.2.1 BLAST**

12 BLAST is the most well-known analytics tool in life sciences and has become an essential  
13 program in every branch of biology to find regions of local similarity between biological  
14 (protein or nucleotide) sequences [18,22]. While the web-based National Center for  
15 Biotechnology Information (NCBI) BLAST suite of programs provides comprehensive  
16 sequence comparison, it is a major bottleneck due to delayed new data submission with  
17 embargo issues (including user-specific new data) and public availability on central BLAST  
18 repositories. Fortunately, BLAST can be installed and run locally, but its usage can be  
19 challenging for biologists who have limited experience of command-line interfaces.  
20 Furthermore, purchasing commercial software of a rich GUI-standalone tool (e.g. CLC  
21 Genomic Workbench and Geneious) and its licences is too expensive for many researchers and  
22 laboratories. To resolve these matters, *easyfm* provides a new Python-based free GUI for  
23 BLAST and more (Fig 2). Users can explore all BLAST+ (v2.11.0) features by creating a local  
24 database from which output format can be selected for including controlling analyses  
25 parameters and CPU cores. Even a common BLAST archive format (ASN.1) can be converted  
26 to any BLAST output format via Result Convert (Fig 2D). To save storage space and enable  
27 faster downstream analysis, a BLAST extensible markup language (XML) format (even  
28 generated externally) can be converted into a more compact form (e.g. a human-readable csv  
29 file) via XML Parsing (Fig 2E). Along with recent free tools [10–12], *easyfm* BLAST enables  
30 easy and seamless integration of visual and interactive representations of BLAST outputs  
31 supporting sequence similarity search. In particular, *easyfm* offers support for  
32 creating/searching a local database, changing format and parsing XML files as a standalone

- 1 cross-platform application. This comprehensive and autonomous interface makes *easyfm*
- 2 unique when compared to other free existing tools which need to rely on several different web
- 3 servers.

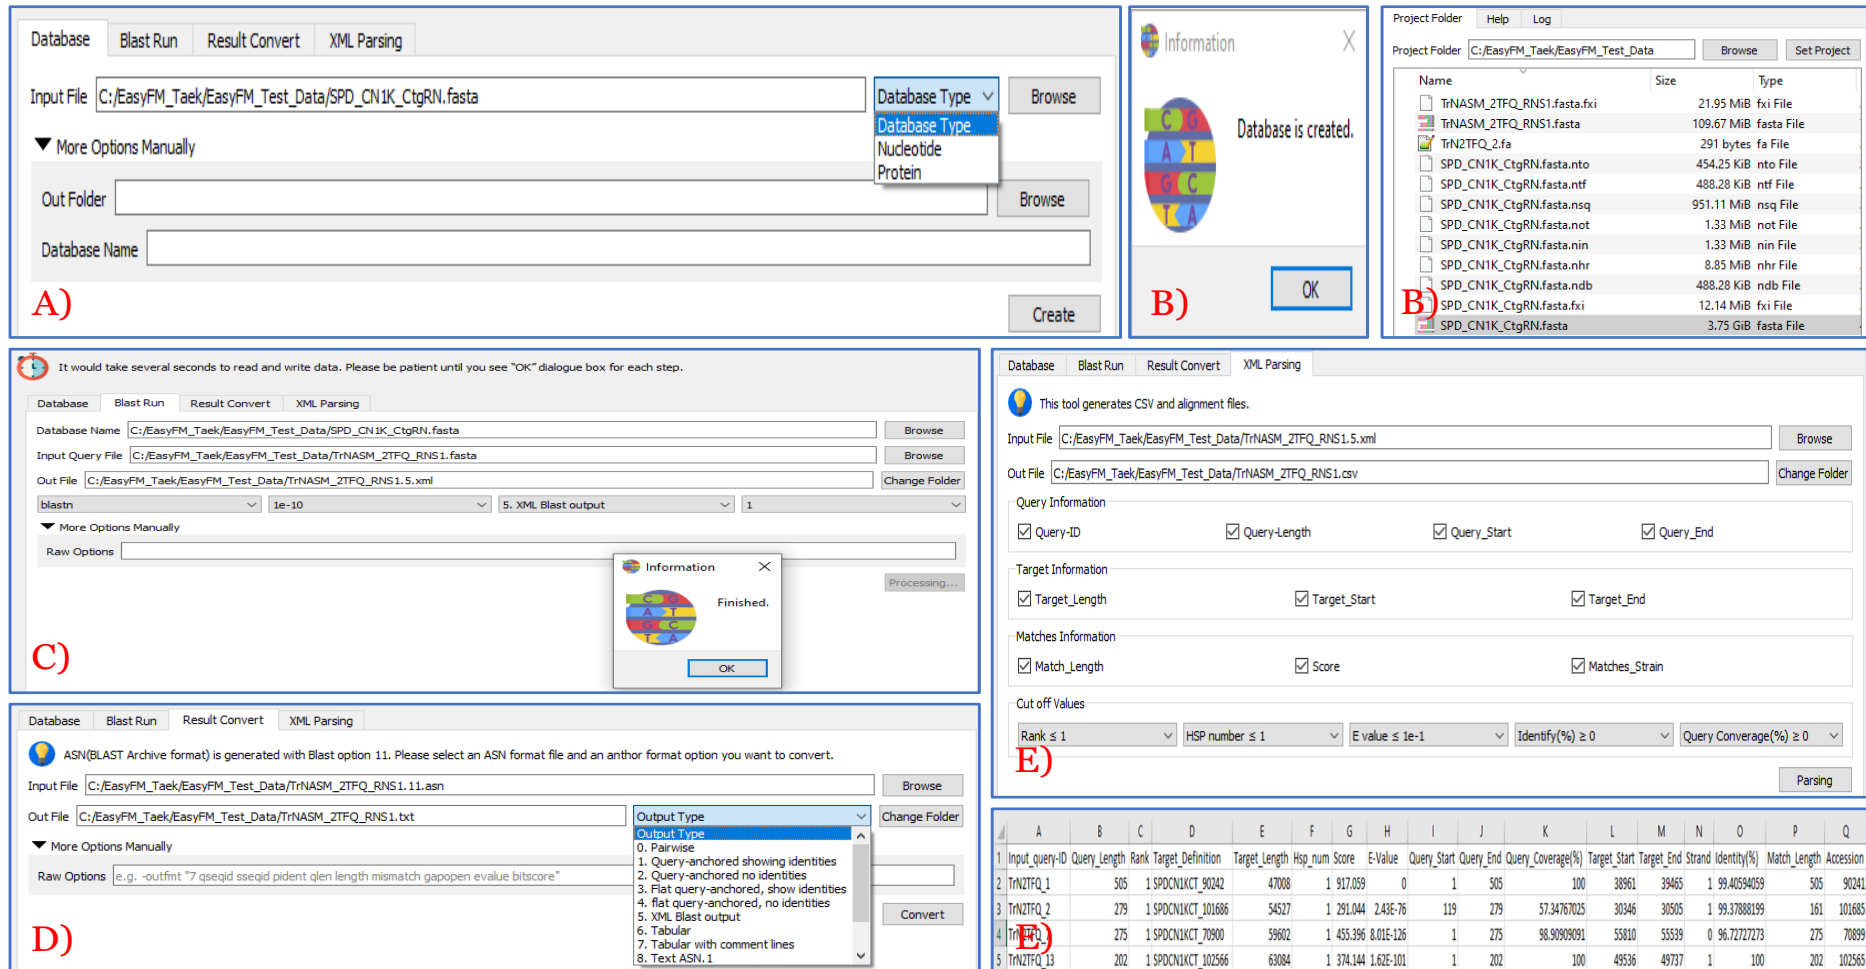

**Fig 2. User-friendly standalone work modules in *easyfm*: BLAST module.** Most steps include further manual options for a user-specified parameter. A) Create a local database by selecting nucleotide or protein. B) Job completion message and created database files listed in a secondary window. C) Run local BLAST with multiple features including output type. D) Convert from a BLAST archive file to a different output format. E) A BLAST xml file parsing with multiple options for a csv file.

1

## 2 **3.2.2 BLAT**

3 BLAT is one of the alignment algorithms developed for the pairwise analysis and comparison  
4 of biological sequences with the primary goal of inferring homology to discover the biological  
5 function of genomic sequences [21]. While BLAT is less sensitive than BLAST, BLAT has a  
6 few clear advantages over BLAST from a practical standpoint in speed and convenience [23].  
7 Compared to pre-existing pairwise sequence alignment tools, BLAT performed ~500 times  
8 faster with mRNA/DNA alignments and ~50 times faster with protein/protein alignments [21].  
9 BLAT can be used either as a web-based server-client program ([https://genome.ucsc.edu/cgi-](https://genome.ucsc.edu/cgi-bin/hgBlat)  
10 [bin/hgBlat](https://genome.ucsc.edu/cgi-bin/hgBlat)) or as a standalone command-line program [23], but not a user-friendly GUI.  
11 However, *easyfm* BLAT (v3.2.1) enables users to control all parameters with a simple mouse  
12 click (Fig 3A) that can be a great advantage for novice biologists. Along with freely available  
13 *easyfm* BLAST, *easyfm* BLAT will simplify distributed computation pipelines to facilitate the  
14 rapid discovery of sequence similarities between NGS datasets. However, if the target genome  
15 and input sequences are big, using the standalone command-line BLAT in HPC is more suitable  
16 for batch runs, and more efficient than the web- and GUI-based BLAT because the standalone  
17 command-line in HPC can store more memory.

Blat Run

Light weight only (Recommended to use a small set data. For big genome in Database Name, please use each chromosome file, respectively).

Database Name

Input File

Out File

Database Type  Query Type  Tile Size  Step Size  One Off

More Options Manually

Options

**Fig 3. User-friendly standalone work modules in *easyfm*: BLAT module.** Most steps include further manual options for a user-specified parameter. Create and run a local database with multiple options for a psl file that can open with text editor and Excel.

### 1 3.2.3 ORF

2 An ORF(s) is the part of a reading frame that can be translated. The ORF (potential protein-  
3 coding sequence) is a continuous stretch of codons that usually begins with a start codon and  
4 ends at a stop codon. Understanding ORF(s) has become a piece of essential evidence to assist  
5 in gene prediction. As with other ORF finding tools, *easyfm* performs a six-frame translation  
6 of a nucleotide given a particular genetic code, finding all ORFs possible. Long ORFs are often  
7 used, along with other evidence, to initially identify candidate protein-coding regions or  
8 functional RNA-coding regions in a given DNA sequence, but the presence of an ORF does  
9 not necessarily mean that the region is always translated [24]. As BLAST and BLAT, the web-  
10 based ORF Finder (<https://www.ncbi.nlm.nih.gov/orffinder/>), ORF Predictor  
11 (<http://bioinformatics.yzu.edu/tools/OrfPredictor.html>) and command-line tools (ORF  
12 Investigator [25] and orfipy [13]) offer a range of ORF searches, but its usage can be  
13 challenging for biologists due to lack of computer programming literacy and limited query  
14 sequence length. To maximise the flexibility, the *easyfm* ORF provides a fast and efficient  
15 approach for all possible translation and extraction of ORFs from nucleotide sequences  
16 (FASTA format of nucleotide and protein output from six-frame translation) (Fig 4). With a  
17 simple mouse click solution, users can compare the translated outcomes with their biological  
18 evidence to avoid false discovery as well as control specific parameters without any limitation  
19 of query sequence length. Along with existing tools [13,25], *easyfm* ORF will provide rapid,  
20 flexible searches in multiple output formats to allow the easy downstream analysis of ORFs.

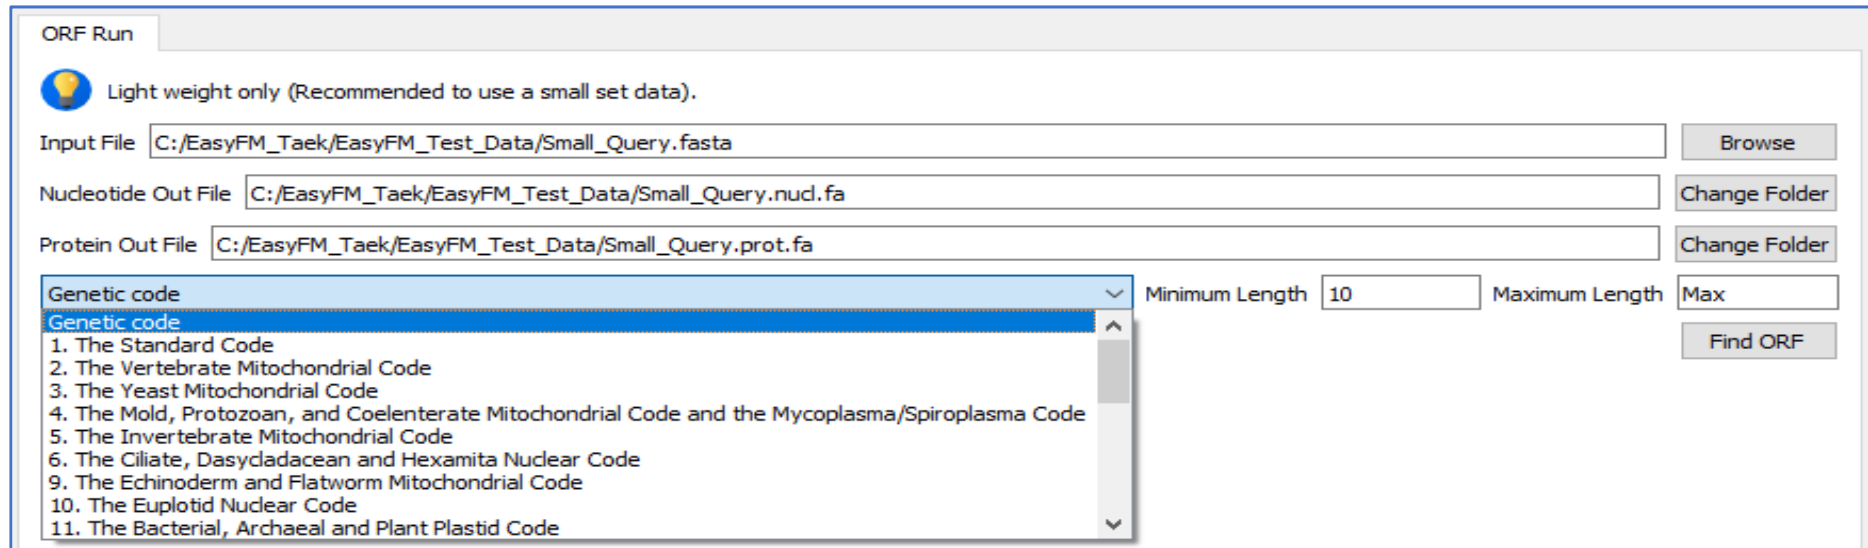

**Fig 4. User-friendly standalone work modules in *easyfm*: ORF module.** Most steps include further options for a user-specified parameter. Run ORF with different genetic codes for coding and protein sequences. A FASTA format output file of nucleotide and protein from a six-frame translation will be generated.

### 1 3.2.4 File Manipulation

2 Various file formats have been introduced with the development of different DNA/RNA  
3 sequencing technologies. While there are many different biological file formats related to NGS  
4 analyses (or to store and manipulate), FASTA/Q files are most commonly encountered in the  
5 bioinformatics community. This is due to their flexibility: FASTA/Q files can be read, mapped  
6 and indexed by several different software packages to generate SAM/BAM, GFF/GTF, VCF,  
7 and more. Using a fai index file in conjunction with a FASTA/Q file containing reference  
8 sequences enables efficient access to arbitrary regions within those reference sequences and  
9 extracts subsequences from the indexed reference sequence (Danecek et al. 2021; Quinlan &  
10 Hall 2010).

11 Like other modules, the web-based Galaxy (homepage: <https://galaxyproject.org>, main  
12 public server: <https://usegalaxy.org>, Australia: <https://usegalaxy.org.au/>) and command-line  
13 tools (Samtools and BCFtools [14]; BEDTools [26]) offer a range of NGS data file  
14 manipulation capabilities, but its usage can be challenging for biologists due to lack of  
15 computer language literacy and internet dependence. To enhance and extend the flexibility and  
16 convenience, we present *easyfm*, a free single GUI for NGS file manipulation (mainly for  
17 FASTA files) (Fig 5). Since users can control everything with a simple mouse click on a  
18 desktop, the tools available in the *easyfm* would be a convenient way to teach  
19 bioinformatics/data analysis, and to quickly analyse results without being hampered by  
20 command line tools and HPC Secure Shell (SSH) connections.

21 Users can import any FASTA/Q files to index and extract the indexed ID with its  
22 sequence by double-clicking, matching Prefix ID and selecting a provided text file (Fig 5A).  
23 Even the FASTQ file can be converted to the FASTA file and the given FASTA file change its  
24 direction via Reverse Complement and Reverse (Fig 5B and 5C). For wide applications, *easyfm*  
25 File Manipulation also allows users to easily manipulate (including filtering [IDs, features and  
26 strand] and extracting sequence regions) and consolidate from GFF and GTF files if its  
27 corresponding reference genome/transcriptome sequences are present (Fig 5D). To enhance  
28 user-friendliness, users can extract a given sequence as a FASTA file with extra flanking  
29 regions for both directions by entering the desired sequence length (numeric numbers). Along  
30 with existing tools [14,26], *easyfm* File Manipulation will provide a stable and modular  
31 platform for manipulating sequence data and files to ensure high reproducibility standards in  
32 the NGS era.



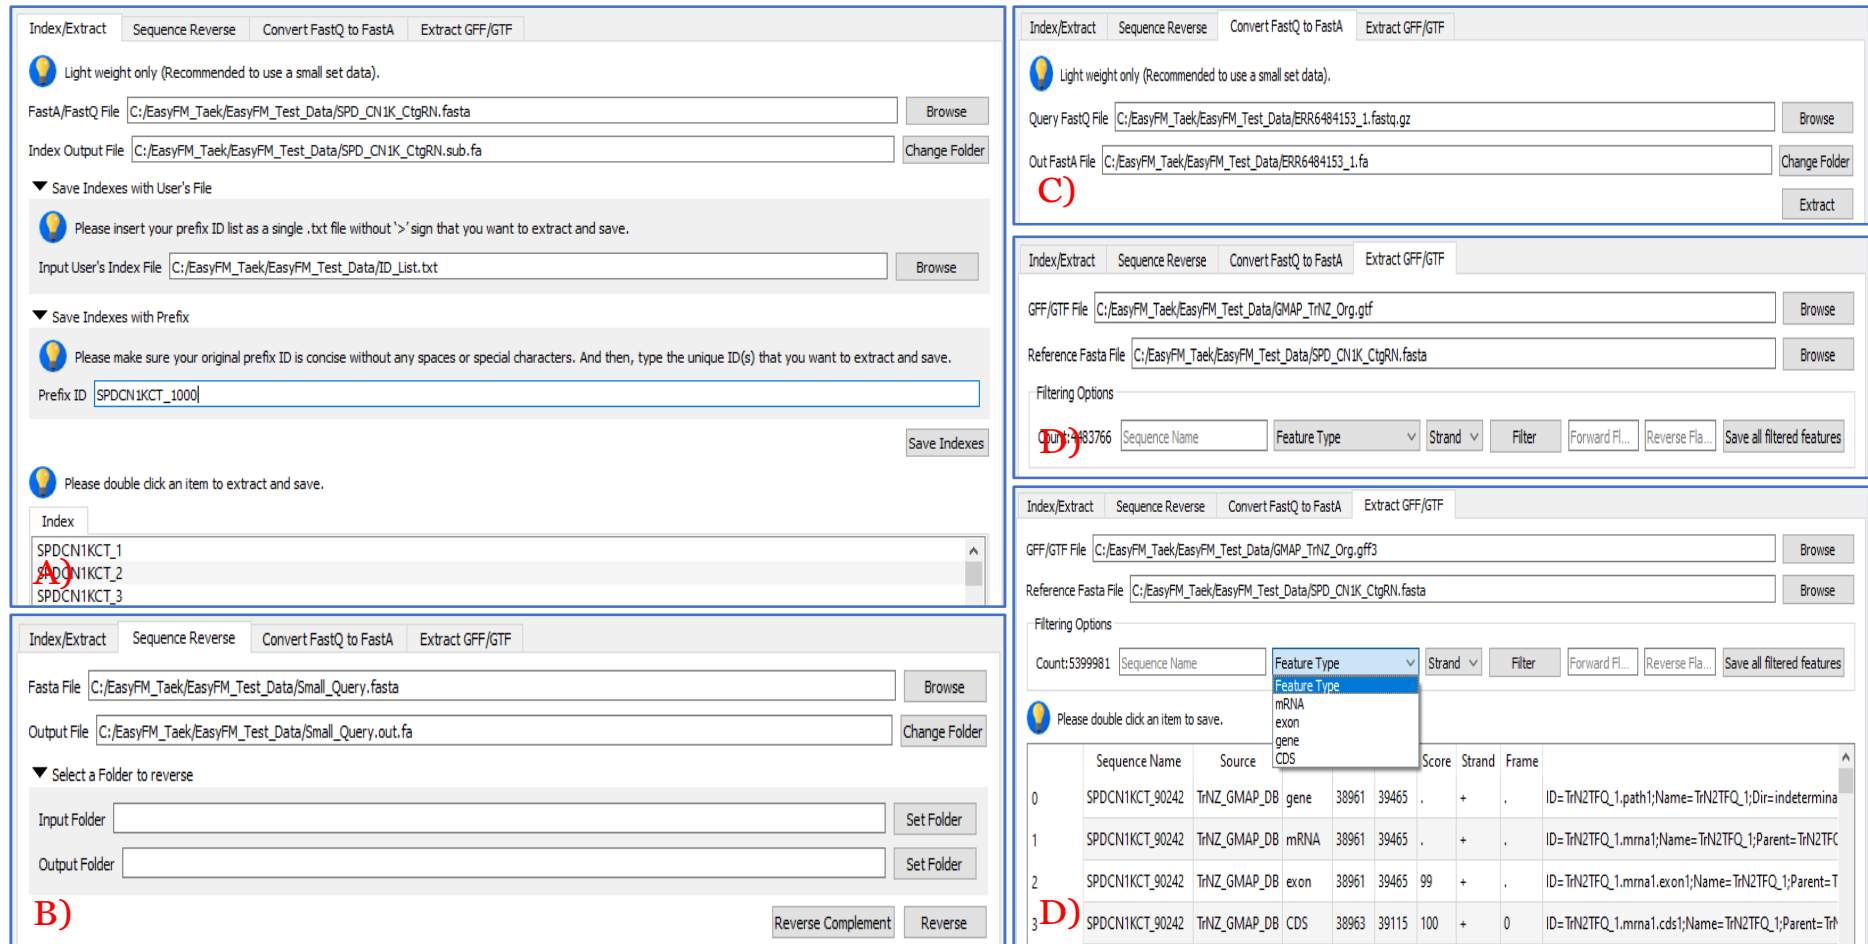

**Fig 5. User-friendly standalone work modules in *easyfm*: File Manipulation module.** Most steps include further individual selection by manually saving as a FASTA file for a user-specified sequence ID. A) Select a FASTA file to index. B) Convert nucleotide sequences for reverse complement or just reverse sequence. C) Convert and extract from FASTQ to FASTA. D) Extract sequences with specific IDs from indexed reference FASTA and GFF3/GTF files with different features.

1

## 2 **Availability and future directions**

3 *easyfm* is implemented in Python and available under the MIT license and works on Windows,  
4 Linux and Mac systems. This package is also available on PyPI python package manager. The  
5 current code runs under Python 3.7+ and virtualenv. Other dependency includes gffutils,  
6 pyfastx, PyQt5 and Biopython (Table 1). More information and the manual may be obtained  
7 from the website: <https://github.com/TaekAndBrendan/easyfm>.

8 In the future, we will continue to update the toolbox with new fast and easy GUI support,  
9 including new embedding methods such as DIAMOND [27,28], (Buchfink et al. 2015, 2021)  
10 and pBLAT [29] with low resource requirements and both multithread and cluster computing  
11 support, making these methods suitable for running on standard desktops and laptops. Future  
12 versions of *easyfm* will also include additional integration points allowing us to intersect, merge,  
13 count, complement, and shuffle genomic intervals from multiple files in widely-used genomic  
14 file formats such as BAM, BED and VCF.

## 1 **Acknowledgements**

2 The authors are grateful to their colleagues (special thanks to Maddie James, Melanie  
3 Wilkinson, Cara Conradsen, and Nicholas O'Brien) and collaborators for their valuable and  
4 constructive comments.

5

## 1    **References**

- 2    1. Breese MR, Liu Y. NGSUtils: a software suite for analyzing and manipulating next-  
3    generation sequencing datasets. *Bioinformatics*. 2013;29:494–496.
- 4    2. Jung H, Winefield C, Bombarely A, Prentis P, Waterhouse, P. Tools and strategies for long-  
5    read sequencing and de novo assembly of plant genomes. *Trends Plant Sci*. 2019;24:700-724.
- 6    3. Jung H, Ventura T, Chung J, Kim WJ, Nam BH, Kong H, et al. Twelve quick steps for  
7    genome assembly and annotation in the classroom. *PLoS Comput Biol*. 2020;16:e1008325.
- 8    4. Pearson WR, Lipman DJ. Improved tools for biological sequence comparison. *Proc Natl*  
9    *Acad Sci USA*. 1988;85:2444–2448.
- 10    5. Cock PJA, Fields CJ, Goto N, Heuer ML, Rice PM. The Sanger FASTQ file format for  
11    sequences with quality scores, and the Solexa/Illumina FASTQ variants. *Nucleic Acids Res*.  
12    2010;38:1767–1771.
- 13    6. Li H, Handsaker B, Wysoker A, Fennell T, Ruan J, Homer N, et al. The sequence  
14    alignment/map format and SAMtools. *Bioinformatics*. 2009;25:2078–2079.
- 15    7. Kent WJ, Sugnet CW, Furey TS, Roskin KM, Pringle TH, Zahler AM, et al. The human  
16    genome browser at UCSC. *Genome Res*. 2002;12:996–1006.
- 17    8. Pertea G, Pertea M. GFF Utilities: GffRead and GffCompare. *F1000Research*. 2020;9:304.
- 18    9. Danecek P, Auton A, Abecasis G, Albers CA, Banks E, DePristo MA, et al. The variant call  
19    format and VCFtools. *Bioinformatics*. 2011;27:2156–2158.
- 20    10. Kim DW, Kim RN, Kim DS, Choi SH, Chae SH, Park HS. easySEARCH: A user-  
21    friendly bioinformatics program that enables BLAST searching with a massive number of  
22    query sequences. *Bioinformation*. 2012;8:792–794.
- 23    11. Blanco-Míguez A, Fdez-Riverola F, Sánchez B, Lourenço A. BlasterJS: A novel  
24    interactive JavaScript visualisation component for BLAST alignment results. *PLoS One*.  
25    2018;13:e0205286.
- 26    12. Priyam A, Woodcroft BJ, Rai V, Moghul I, Munagala A, Ter F, et al. Sequenceserver: A  
27    Modern Graphical User Interface for Custom BLAST Databases. *Mol Biol Evol*.  
28    2019;36:2922–2924.
- 29    13. Singh U, Wurtele, ES. "orfipy: a fast and flexible tool for extracting ORFs". *Bioinformatics*.  
30    2021;btab090.
- 31    14. Danecek P, Bonfield JK, Liddle J, Marshall J, Ohan V, Pollard MO, et al. *Gigascience*.  
32    2021;10:giab008.
- 33    15. Baker QB, Hammad MM, Al-Rashdan W, Jararweh Y, Al-Smadi M, Al-Zinati M.  
34    Comprehensive comparison of Cloud-based NGS data analysis and alignment tools.  
35    *Informatics in Medicine Unlocked*. 2020;18:100296.

- 1 16. Afgan E, Baker D, Batut B, van den Beek M, Bouvier D, Čech M, et al. The Galaxy  
2 platform for accessible, reproducible and collaborative biomedical analyses: 2018 update.  
3 *Nucleic Acids Res.* 2018;46:W537–W544.
- 4 17. Serrano-Solano B, Föll MC, Gallardo-Alba C, Erxleben A, Rasche H, Hiltemann S, et al.  
5 Fostering accessible online education using Galaxy as an e-learning platform. *PLoS Comp Biol.*  
6 2021;17:e1008923.
- 7 18. Cock PJA, Antao T, Chang JT, Chapman BA, Cox CJ, Dalke A, et al. Biopython: freely  
8 available Python tools for computational molecular biology and bioinformatics.  
9 *Bioinformatics.* 2009;25:1422–1423.
- 10 19. Du L, Liu Q, Fan Z, Tang J, Zhang X, Price M, et al. Pyfastx: a robust Python package  
11 for fast random access to sequences from plain and gzipped FASTA/Q files. *Brief Bioinform.*  
12 2021; 22:bbaa368.
- 13 20. Camacho C, Coulouris G, Avagyan V, Ma N, Papadopoulos J, Bealer K, et al. BLAST+:  
14 architecture and applications. *BMC Bioinformatics.* 2009;10:421.
- 15 21. Kent, WJ. BLAT--the BLAST-like alignment tool. *Genome Res.* 2002;12):656–664.
- 16 22. Altschul S. Gapped BLAST and PSI-BLAST: a new generation of protein database  
17 search programs. *Nucleic Acids Res.* 1997;25: 3389–3402.
- 18 23. Bhagwat M, Young L, Robison R. Using BLAT to find sequence similarity in closely  
19 related genomes. *Curr Protoc Bioinformatics.* 2012;Chapter10:Unit10.8.
- 20 24. Deonier R, Tavaré S, Waterman M. *Computational Genome Analysis: an introduction.*  
21 Springer-Verlag. 2005;25.
- 22 25. Dwivedi VD, Mishra SK. ORF Investigator: A New ORF finding tool combining Pairwise  
23 Global Gene Alignment. *Res J Recent Sci.* 2012;1:32–35.
- 24 26. Quinlan AR, Hall IM. BEDTools: a flexible suite of utilities for comparing genomic  
25 features. *Bioinformatics.* 2010;26:841–842.
- 26 27. Buchfink B, Xie C, Huson DH. Fast and sensitive protein alignment using DIAMOND. *Nat*  
27 *Methods.* 2015;12:59–60.
- 28 28. Buchfink B, Reuter K, Drost HG. Sensitive protein alignments at tree-of-life scale using  
29 DIAMOND. *Nat Methods.* 2021;18:366–368.
- 30 29. Wang M, Kong L. pblat: a multithread blat algorithm speeding up aligning sequences to  
31 genomes. *BMC Bioinformatics.* 2019;20:28.

32

It would take several seconds to read and write data. Please be patient until you see "OK" dialogue box for each step.

Database Blast Run Result Convert XML Parsing

Input File  Database Type  Browse

▼ More Options Manually

Out Folder  Browse

Database Name

Create

**A)**

Project Folder Help Log

Project Folder  Browse Set Project

| Name                     | Size      | Type       |
|--------------------------|-----------|------------|
| TN2TFQ_RNS1.fasta.fxi    | 21.95 MB  | fxi File   |
| TN2TFQ_RNS1.fasta        | 109.67 MB | fasta File |
| TN2TFQ_2.fa              | 291 bytes | fa File    |
| SPD_CN1K_CtgRN.fasta.fxi | 12.14 MB  | fxi File   |
| SPD_CN1K_CtgRN.fasta     | 3.75 GiB  | fasta File |
| Small_Query.fasta.fxi    |           | fxi File   |
| Small_Query.fasta        |           | fasta File |
| GMAP_TN2_Orig.gtf        |           | gtf File   |
| GMAP_TN2_Orig.gtf3       |           | gtf3 File  |

**B)**

Fasta Information

Type: DNA

Total Sequence(bp) : 3,988,946,937

Sequence Counts : 116,288

Sequence Average Length(bp) : 34,302.3092408503

Sequence Median Length(bp) : 24,711.0

GC Content(%) : 35.86

N50 and L50(bp) : (17676, 80054)

N75 and L75(bp) : (26711, 52833)

N90 and L90(bp) : (17676, 80054)

OK

**C)**

easyfm

File Tools View Help

Project Folder Help Log

**easyfm**

easyfm has four main tools: *Blast*, *Blat*, *ORF* and *File Manipulation*.

**Blast**

[BLAST® Command Line Applications User Manual](#)

- Create database - [command options](#)
- Run Blast - [command options](#)
  - [blastn](#)
  - [blastx](#)
  - [tblastn](#)
  - [tblastx](#)
- Convert Blast result - [command options](#)
- Parse Blast XML result

**Blat**

[What is Blat?](#)

[Run Blat - command options](#)

**D)**

Project Folder Help Log

Command \*\*\*\*\*

```
C:\EasyFM_Taek\easyfm-v082\easyfm-v082\bin\pbi-blast\exes\makeblastdb.exe -i C:\EasyFM_Taek\EasyFM_Test_Data\SPD_CN1K_CtgRN.fasta -dtype nul
```

Building a new DB, current time: 09/02/2021 12:05:14

New DB name: C:\EasyFM\_Taek\EasyFM\_Test\_Data\SPD\_CN1K\_CtgRN.fasta

New DB title: C:\EasyFM\_Taek\EasyFM\_Test\_Data\SPD\_CN1K\_CtgRN.fasta

Sequence type: Nucleotide

Keep MBits: T

Maximum file size: 1000000000B

**D)** Adding sequences from FASTA; added 116288 sequences in 20.7673 seconds.

Database Blast Run Result Convert XML Parsing

Input File  Database Type  Database Type Database Type Nucleotide Protein

Out Folder

Database Name

**A)**

Information

Database is created.

**B)**

Project Folder

| Name                                                     | Size      | Type       |
|----------------------------------------------------------|-----------|------------|
| <input type="checkbox"/> TrNASM_2TFQ_RNS1.fasta.fxi      | 21.95 MB  | fxi File   |
| <input type="checkbox"/> TrNASM_2TFQ_RNS1.fasta          | 109.67 MB | fasta File |
| <input checked="" type="checkbox"/> TrN2TFQ_2.fa         | 291 bytes | fa File    |
| <input type="checkbox"/> SPD_CN1K_CtgRN.fasta.nto        | 454.25 KB | nto File   |
| <input type="checkbox"/> SPD_CN1K_CtgRN.fasta.ntf        | 488.28 KB | ntf File   |
| <input type="checkbox"/> SPD_CN1K_CtgRN.fasta.nsq        | 951.11 MB | nsq File   |
| <input type="checkbox"/> SPD_CN1K_CtgRN.fasta.not        | 1.33 MB   | not File   |
| <input type="checkbox"/> SPD_CN1K_CtgRN.fasta.nin        | 1.33 MB   | nin File   |
| <input type="checkbox"/> SPD_CN1K_CtgRN.fasta.nhr        | 8.85 MB   | nhr File   |
| <input type="checkbox"/> SPD_CN1K_CtgRN.fasta.ndb        | 488.28 KB | ndb File   |
| <input type="checkbox"/> SPD_CN1K_CtgRN.fasta.fxi        | 12.14 MB  | fxi File   |
| <input checked="" type="checkbox"/> SPD_CN1K_CtgRN.fasta | 3.75 GB   | fasta File |

**B)**

It would take several seconds to read and write data. Please be patient until you see "OK" dialogue box for each step.

Database Blast Run Result Convert XML Parsing

Database Name

Input Query File

Out File

blastn 1e-10 5. XML Blast output 1

Raw Options

Processing...

Information Finished.

**C)**

Database Blast Run Result Convert XML Parsing

This tool generates CSV and alignment files.

Input File

Out File

Query Information

Query-ID  Query-Length  Query\_Start  Query\_End

Target Information

Target\_Length  Target\_Start  Target\_End

Matches Information

Match\_Length  Score  Matches\_Strain

Cut off Values

Rank ≤ 1 HSP number ≤ 1 E value ≤ 1e-1 Identify(%) ≥ 0 Query Coverage(%) ≥ 0

**E)**

Database Blast Run Result Convert XML Parsing

ASN(BLAST Archive format) is generated with Blast option 11. Please select an ASN format file and an author format option you want to convert.

Input File

Out File

Output Type

- 0. Pairwise
- 1. Query-anchored showing identities
- 2. Query-anchored no identities
- 3. Flat query-anchored, show identities
- 4. Flat query-anchored, no identities
- 5. XML Blast output
- 6. Tabular
- 7. Tabular with comment lines
- 8. Text ASN.1

Raw Options

**D)**

|   | A              | B            | C    | D                 | E             | F       | G       | H         | I           | J         | K                 | L            | M          | N      | O           | P            | Q         |
|---|----------------|--------------|------|-------------------|---------------|---------|---------|-----------|-------------|-----------|-------------------|--------------|------------|--------|-------------|--------------|-----------|
| 1 | Input_query-ID | Query_Length | Rank | Target_Definition | Target_Length | Hsp_num | Score   | E-Value   | Query_Start | Query_End | Query_Coverage(%) | Target_Start | Target_End | Strand | Identity(%) | Match_Length | Accession |
| 2 | TrN2TFQ_1      | 505          | 1    | SPOONKCT_90342    | 47008         | 1       | 917.059 | 0         | 1           | 505       | 100               | 30961        | 35465      | 1      | 99.40594059 | 505          | 90342     |
| 3 | TrN2TFQ_2      | 279          | 1    | SPOONKCT_101686   | 54527         | 1       | 251.044 | 2.43E-76  | 119         | 279       | 57.34767025       | 30346        | 30505      | 1      | 99.37888109 | 161          | 101685    |
| 4 | TrN2TFQ_3      | 275          | 1    | SPOONKCT_70900    | 59802         | 1       | 455.396 | 6.01E-126 | 1           | 275       | 98.90909091       | 50020        | 50109      | 0      | 96.73121070 | 275          | 70900     |
| 5 | TrN2TFQ_13     | 202          | 1    | SPOONKCT_102566   | 63084         | 1       | 374.044 | 1.62E-101 | 1           | 202       | 100               | 49536        | 49707      | 1      | 100         | 202          | 102565    |

EasyFM\_Figure2

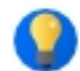

Light weight only (Recommended to use a small set data. For big genome in Database Name, please use each chromosome file, respectively).

Database Name

Input File

Out File

Database Type

Query Type

Tile Size

Step Size

One Off

▼ More Options Manually

Options

# EasyFM\_Figure3



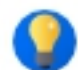

Light weight only (Recommended to use a small set data).

Input File

Browse

Nucleotide Out File

Change Folder

Protein Out File

Change Folder

Genetic code

Genetic code

1. The Standard Code
2. The Vertebrate Mitochondrial Code
3. The Yeast Mitochondrial Code
4. The Mold, Protozoan, and Coelenterate Mitochondrial Code and the Mycoplasma/Spiroplasma Code
5. The Invertebrate Mitochondrial Code
6. The Ciliate, Dasydadacean and Hexamita Nuclear Code
9. The Echinoderm and Flatworm Mitochondrial Code
10. The Euplotid Nuclear Code
11. The Bacterial, Archaeal and Plant Plastid Code

Minimum Length

Maximum Length

Find ORF

# EasyFM\_Figure4

Index/Extract Sequence Reverse Convert FastQ to FastA Extract GFF/GTF

Light weight only (Recommended to use a small set data).

FASTA/FastQ File  Browse

Index Output File  Change Folder

Save Indexes with User's File

Please insert your prefix ID list as a single .txt file without '>' sign that you want to extract and save.

Input User's Index File  Browse

Save Indexes with Prefix

Please make sure your original prefix ID is concise without any spaces or special characters. And then, type the unique ID(s) that you want to extract and save.

Prefix ID  Save Indexes

Please double click an item to extract and save.

Index

- SPDCN1KCT\_1
- A)** SPDCN1KCT\_2
- SPDCN1KCT\_3

Index/Extract Sequence Reverse Convert FastQ to FastA Extract GFF/GTF

Fasta File  Browse

Output File  Change Folder

Select a Folder to reverse

Input Folder  Set Folder

Output Folder  Set Folder

**B)** Reverse Complement Reverse

Index/Extract Sequence Reverse Convert FastQ to FastA Extract GFF/GTF

Light weight only (Recommended to use a small set data).

Query FastQ File  Browse

Out FastA File  Change Folder

**C)** Extract

Index/Extract Sequence Reverse Convert FastQ to FastA Extract GFF/GTF

GFF/GTF File  Browse

Reference Fasta File  Browse

Filtering Options

**D)** 483766  Feature Type  Filter   Save all filtered features

Index/Extract Sequence Reverse Convert FastQ to FastA Extract GFF/GTF

GFF/GTF File  Browse

Reference Fasta File  Browse

Filtering Options

Count: 5399981  Feature Type  Filter   Save all filtered features

Please double click an item to save.

|             | Sequence Name   | Source       | Feature Type | Score | Strand | Frame |   |   |                                                      |
|-------------|-----------------|--------------|--------------|-------|--------|-------|---|---|------------------------------------------------------|
| 0           | SPDCN1KCT_90242 | T1N2_GMAP_DB | gene         | 38961 | 39465  | .     | + | . | ID= T1N2TFQ_1.path1;Name= T1N2TFQ_1;Ori= indetermi   |
| 1           | SPDCN1KCT_90242 | T1N2_GMAP_DB | mRNA         | 38961 | 39465  | .     | + | . | ID= T1N2TFQ_1.mrna1;Name= T1N2TFQ_1;Parent= T1N2TFQ  |
| 2           | SPDCN1KCT_90242 | T1N2_GMAP_DB | exon         | 38961 | 39465  | 99    | + | . | ID= T1N2TFQ_1.mrna1.exon1;Name= T1N2TFQ_1;Parent= T1 |
| <b>D)</b> 3 | SPDCN1KCT_90242 | T1N2_GMAP_DB | CDS          | 38963 | 39115  | 100   | + | 0 | ID= T1N2TFQ_1.mrna1.cds1;Name= T1N2TFQ_1;Parent= T1  |

EasyFM\_Figure5
